# Supplementary material for: In vitroandex vivomeasurement of the biophysical properties of blood using microfluidic platforms and animal models
Source: Royal Society of Chemistry journal article supplement (doi:10.1039/c8an00231b), 2018-01-01
Supplement: c8an00231b1.pdf [file c8an00231b1.pdf]

## Supplementary Materials

### **In-vitro and ex-vivo measurements of biophysical properties of blood using microfluidic platforms and animal models**

Yang Jun Kang<sup>1</sup> and Sang-Joon Lee<sup>2\*</sup>

1. Department of Mechanical Engineering, Chosun University, Gwangju, Republic of Korea
2. Department of Mechanical Engineering, Pohang University of Science and Technology (POSTECH), Pohang, Republic of Korea

\*Address: Department of Mechanical Engineering, Pohang University of Science and Technology (POSTECH), 77 Cheongam-Ro, Nam-gu, Pohang, Gyeongbuk 790-784, Republic of South Korea. Fax: +82-54-279-3199

\*E-mail: [sjlee@postech.ac.kr](mailto:sjlee@postech.ac.kr)

**S1. Summary of commercialized products for measurement of haemorheological properties**

|                              | Commercialized Product                                                                                                         |                                                                                                                                  |                                                                                                                           |                                                                                                                                |
|------------------------------|--------------------------------------------------------------------------------------------------------------------------------|----------------------------------------------------------------------------------------------------------------------------------|---------------------------------------------------------------------------------------------------------------------------|--------------------------------------------------------------------------------------------------------------------------------|
| Viscosity or viscoelasticity | Health Onvector (USA)<br><br>Hemathix Scv-300 | Kyoto electronics (Japan)<br><br>EMS-1000       | Nano Biz (Korea)<br><br>Viscore         | Vilastic Scientific (USA)<br><br>Vilastic-3 |
| Deformability or Aggregation | RR Mechatronics (Netherlands)<br><br>LORRCA   | Myrenne GmbH (Germany)<br><br>Rheodyn SSD      | Rheomeditech (Korea)<br><br>RheoScan-D |                                                                                                                                |
| ESR                          | LabONE (India)<br><br>ESR 2010                | RR Mechatronics (Netherlands)<br><br>Starsed ST |                                                                                                                           |                                                                                                                                |
